# Supplementary material for: Randomised controlled trial of an augmented exercise referral scheme using web-based behavioural support for inactive adults with chronic health conditions: the e-coachER trial
Source: HighWire-hosted journal article supplement (doi:10.1136/bjsports-2020-103121), 2020-11-27
Supplement: bjsports-2020-103121supp006_data_supplement.pdf [file bjsports-2020-103121supp006_data_supplement.pdf]

**Supplementary material - Appendix 6: Additional wear time criteria used in the sensitivity analysis**

Sensitivity analysis were conducted for the following four additional wear time criteria:

- 1)  $\geq 16$  hours over any four days (irrespective of week/weekend);
- 2)  $\geq 10$  hours for 4 days (including at least one weekend day);
- 3)  $\geq 10$  hours over any four days (irrespective of week/weekend);
- 4) A minimum wear criteria of 1 day for 10 hours but with individuals weighted by the number of valid days with a minimum of 10 hours wear.
