# Supplementary material for: Randomised controlled trial of an augmented exercise referral scheme using web-based behavioural support for inactive adults with chronic health conditions: the e-coachER trial
Source: HighWire-hosted journal article supplement (doi:10.1136/bjsports-2020-103121), 2020-11-27
Supplement: bjsports-2020-103121supp010_data_supplement.pdf [file bjsports-2020-103121supp010_data_supplement.pdf]

**Supplementary material – Appendix 10: Tables showing Serious Adverse Events****Serious Adverse Events (SAE) reported in the control group**

| Participant ID (not study number) | MedDRA organ system   | Summary description of event                                                                                       |
|-----------------------------------|-----------------------|--------------------------------------------------------------------------------------------------------------------|
| 1                                 | Neoplasms (2)         | Diagnosed with chronic myeloid leukaemia.                                                                          |
| 2                                 | Neoplasms (2)         | Prolonged hospitalisation due to recurrence of breast cancer.                                                      |
| 3                                 | Psychiatric (7)       | Inpatient stay on mental health ward.                                                                              |
| 2                                 | Psychiatric (7)       | Hospitalised for depression.                                                                                       |
| 4                                 | Nervous system (8)    | Morton's Neuroma.                                                                                                  |
| 5                                 | Respiratory (13)      | Treated in hospital for fluid on the lungs.                                                                        |
| 6                                 | Gastrointestinal (14) | Varices of gastrointestinal tract. Prolonged inpatient stay due to major organ system involvement.                 |
| 7                                 | Musculoskeletal (17)  | Admitted to hospital because unable to walk                                                                        |
| 8                                 | Pregnancy (19)        | Childbirth and post-natal inpatient stay.                                                                          |
| 6                                 | Investigations (23)   | Admitted to hospital with symptoms of meningitis.                                                                  |
| 9                                 | Investigations (23)   | Collapse. No diagnosis made.                                                                                       |
| 10                                | Surgical/medical (25) | Planned admission for femorodistal bypass (peripheral vascular disease), subsequent infection/abscess behind knee. |
| 1                                 | Surgical/medical (25) | Hospitalised for treatment of boils in groin.                                                                      |
| 11                                | Surgical/medical (25) | Planned hospital admission for bunion removal.                                                                     |
| 9                                 | Surgical/medical (25) | Planned hospital admission for bunion removal                                                                      |
| 12                                | Surgical/medical (25) | Hospital admission for treatment for diverticular bleeding.                                                        |
| 13                                | Surgical/medical (25) | Injury to foot led to planned admission for partial amputation of left great toe.                                  |
| 14                                | Surgical/medical (25) | Planned hospital admission for right hip replacement.                                                              |
| 15                                | Surgical/medical (25) | Planned hospitalisation for total hip replacement.                                                                 |
| 16                                | Surgical/medical (25) | Planned hospital admission for total knee replacement.                                                             |
| 17                                | Surgical/medical (25) | Pre-planned hospitalisation for knee surgery due to osteoarthritis.                                                |
| 18                                | Surgical/medical (25) | Planned admission for total right knee replacement.                                                                |
| 18                                | Surgical/medical (25) | Planned admission following infected right knee joint - continuing physio and using crutches.                      |
| 19                                | Surgical/medical (25) | Hospitalisation for emergency operation on knee following a number of falls and pre-existing weakness in knee.     |
| 20                                | Surgical/medical (25) | Hospital admission for surgical repair of bulging disc in lower back.                                              |
| 21                                | Surgical/medical (25) | Hospitalised due to complications from type-2 diabetes and heart failure.                                          |

**Serious Adverse Events (SAE) reported in the intervention group**

| <b>Participant ID (not study number)</b> | <b>MedDRA organ system</b> | <b>Summary Description of Event</b>                                                                                          |
|------------------------------------------|----------------------------|------------------------------------------------------------------------------------------------------------------------------|
| 22                                       | Cardiac (11)               | Admitted to hospital with abnormal ECG. Diagnosis: Paroxysmal Atrial Fibrillation                                            |
| 23                                       | Cardiac (11)               | Hospitalised due to heart attack                                                                                             |
| 24                                       | Vascular (12)              | Hospitalised due to minor stroke.                                                                                            |
| 25                                       | Respiratory (13)           | Asthma attack.                                                                                                               |
| 26                                       | Investigations (23)        | Hospital admission ?meningitis. No formal diagnosis made. Symptoms attributed to adverse effects of prescription medication. |
| 27                                       | Investigations (23)        | Fall resulting in fracture of left radius. Admitted for investigations of reasons for the fall.                              |
| 28                                       | Surgical/medical (25)      | Admitted to hospital following fall with fracture to right ankle and trauma to right knee                                    |
| 29                                       | Surgical/medical (25)      | Preplanned hospital admission for abdominal surgery                                                                          |
| 30                                       | Surgical/medical (25)      | Planned hospitalisation for operation on right ankle                                                                         |
| 31                                       | Surgical/medical (25)      | Admitted to hospital for 1 day (day case) due to osteoarthritis                                                              |
| 32                                       | Surgical/medical (25)      | Planned hospital admission for tendon surgery on hand related to rheumatoid arthritis                                        |
| 33                                       | Surgical/medical (25)      | Hospital admission for treatment of rheumatoid arthritis flare-up.                                                           |
| 34                                       | Surgical/medical (25)      | Inpatient stay for removal of Bartholin's cyst                                                                               |
| 29                                       | Surgical/medical (25)      | Planned hospital admission for knee replacement.                                                                             |
| 28                                       | Surgical/medical (25)      | Planned admission for partial right knee replacement                                                                         |
| 35                                       | Surgical/medical (25)      | Hospitalised for surgery on both knees, as treatment for long-standing osteoarthritis.                                       |
