# Supplementary figures and images for: Randomised controlled trial of an augmented exercise referral scheme using web-based behavioural support for inactive adults with chronic health conditions: the e-coachER trial
Source: HighWire-hosted journal article supplement (doi:10.1136/bjsports-2020-103121), 2020-11-27

## Supplementary material – Appendix 3: Participant pathway

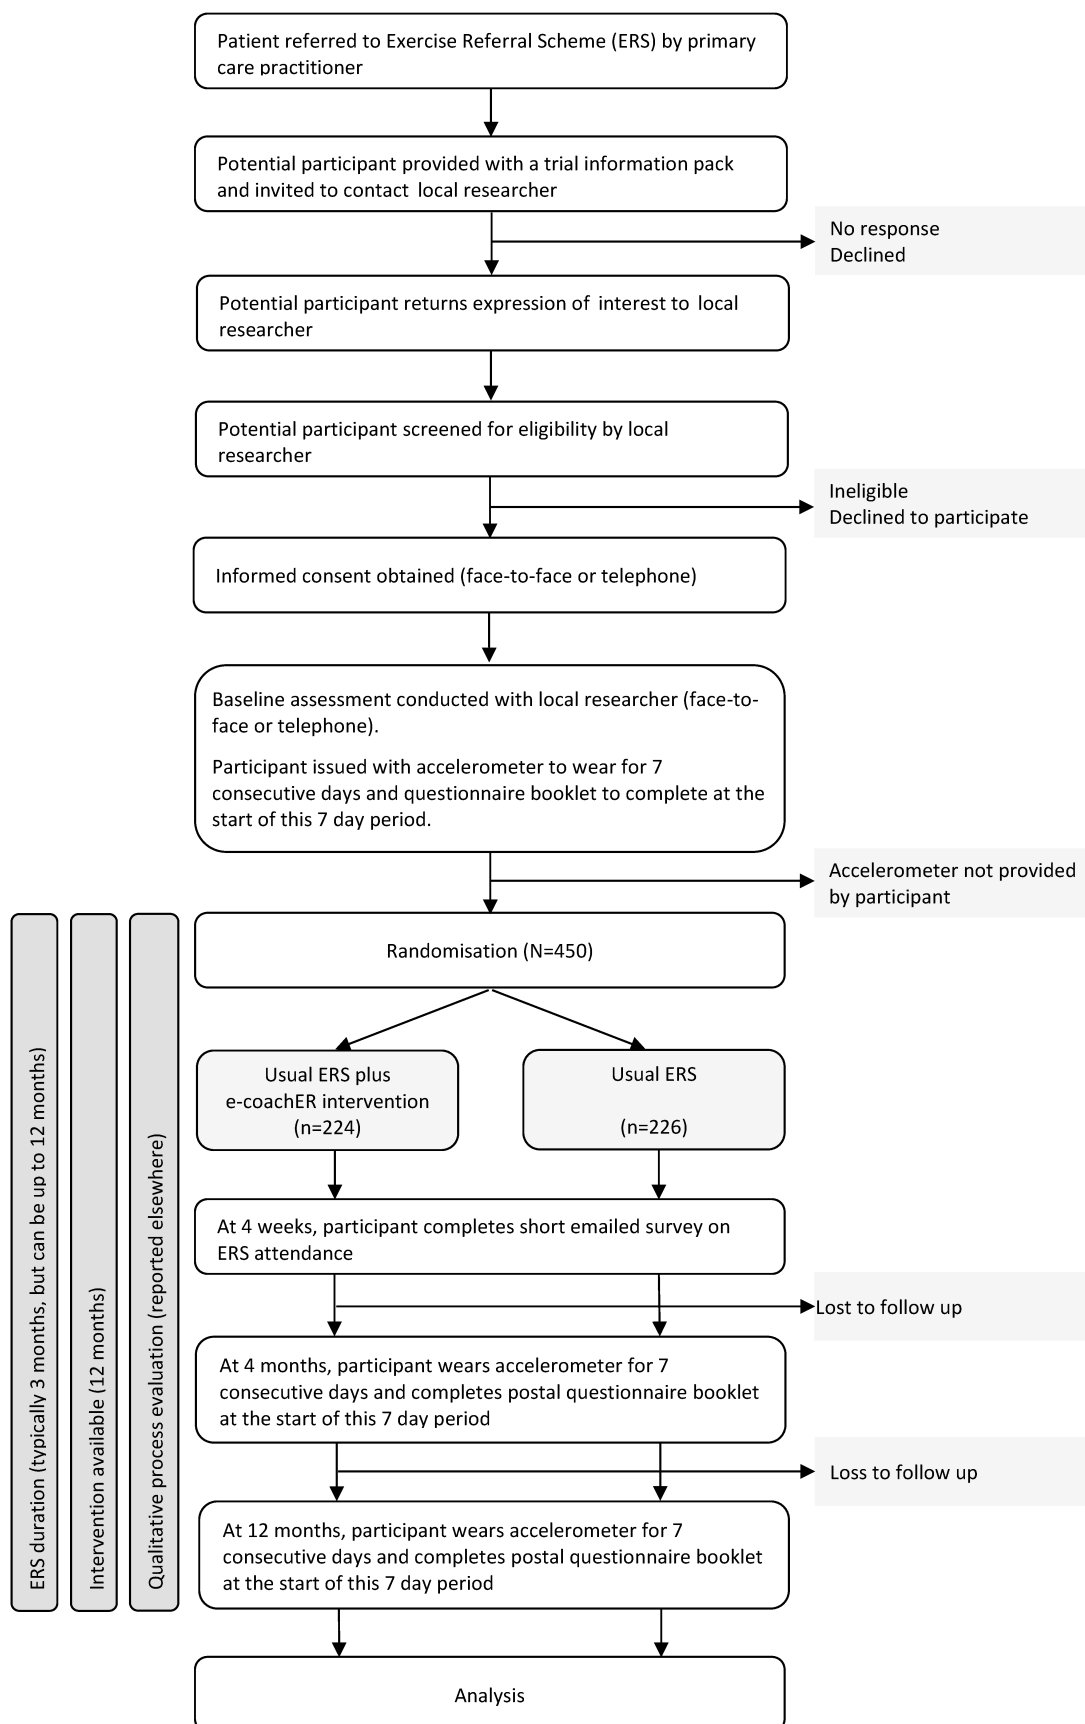

Supplement: bjsports-2020-103121supp003_data_supplement.pdf [file bjsports-2020-103121supp003_data_supplement.pdf]
